# Supplementary material for: Intestinal epithelial Notch-1 protects from colorectal mucinous adenocarcinoma
Source: PubMed Central journal article supplement (PMC6173356; doi:10.18632/oncotarget.26086), 2018-09-11
Supplement: oncotarget-09-33536-s001.pdf [file oncotarget-09-33536-s001.pdf]

## Intestinal epithelial Notch-1 protects from colorectal mucinous adenocarcinoma

### SUPPLEMENTARY MATERIALS

**Supplementary Table 1: Design of the rtPCR murine primers**

| Murine Gene   | Primer Sequences                                                    |
|---------------|---------------------------------------------------------------------|
| Cdc2          | fwd 5'-TCGCATCCCACGTCAAGA-3'<br>rev 5'-GTTTGGCAGGATCATAGACTAGCA-3'  |
| c-Myc2        | fwd 5'-TCTCCACTCACCAGCACAACACTACG-3'<br>rev 5'-ATCTGCTTCAGGACCCT-3' |
| Cyclin B1     | fwd 5'-ACTTCAGCCTGGGTCGCC-3'<br>rev 5'-ACGTCAACCTCTCCGACTTTAGA-3'   |
| Cyclin E      | fwd 5'-ATGTGGCCGTGTTTTGCA-3'<br>rev 5'-GGTCTGATTTTCCGAGGCTGA-3'     |
| Angiogenin-4  | fwd 5'-TCCAGGAGCACACAGCTAGA-3'<br>rev 5'-GCTTGGCATCATAGTGCTGA-3'    |
| Cox2          | fwd 5'-TGAGCACAGGATTTGACCAG-3'<br>rev 5'-CCTTGAAGTGGGTCAGGATG-3'    |
| Hif1 $\alpha$ | fwd 5'-TGCTCATCAGTTGCCACTTC-3'<br>rev 5'-CCATCTGTGCCTTCATCTCA-3'    |
| MMP10         | fwd 5'-CACAAAGCCCAGCTAACTTCC-3'<br>rev 5'-TTTGTCTGGGGTCTCAGGTC-3'   |
| Amphiregulin  | fwd 5'-CATCGGCATCGTTATCACAG-3'<br>rev 5'-ACAGTCCCGTTTTCTTGTCG-3'    |
| Epiregulin    | fwd 5'-CACCGAGAAAGAAGGATGGA-3'<br>rev 5'-GATTCTCCTGGGATGCATGA-3'    |
| Wnt5a         | fwd 5'-GGTGCCATGTCTTCCAAGTT-3'<br>rev 5'-TGAGAAAGTCCTGCCAGTTG-3'    |
